# Supplementary material
Source: HighWire-hosted journal article supplement (https://bmjopen.bmj.com/content/13/12/e076713)
Supplement: inline-supplementary-material-1 [file inline-supplementary-material-1.pdf]

## Study timetable

| Activities                                  | Week             |   |              |   |   |   |    |                   |    |
|---------------------------------------------|------------------|---|--------------|---|---|---|----|-------------------|----|
|                                             | Pre-intervention |   | Intervention |   |   |   |    | Post-intervention |    |
|                                             | 0                | 4 | 5            | 6 | 7 | 8 | 12 | 16                | 20 |
| Screening                                   | x                |   |              |   |   |   |    |                   |    |
| Informed consent and recruitment            | x                |   |              |   |   |   |    |                   |    |
| History taking and physical examination     | x                |   |              |   |   |   |    |                   |    |
| Assessment of number of headache days       | x                | x |              |   |   | x | x  | x                 | x  |
| Assessment of headache intensity            | x                | x | x            | x | x | x | x  | x                 | x  |
| Assessment of quality of life (SF36, CHQLQ) |                  | x |              |   |   | x | x  | x                 | x  |
| Assessment of sleep quality (PSQI)          |                  | x |              |   |   | x | x  | x                 | x  |
| Assessment of depression (MINI ICD10)       |                  | x |              |   |   | x | x  | x                 | x  |
| Assessment of analgesics use                | x                | x | x            | x | x | x | x  | x                 | x  |
| Observation of adverse event                |                  |   | x            | x | x | x |    |                   |    |
| Assessment of flare in SLE (SLEDAI)         | x                | x |              |   |   | x | x  | x                 | x  |
| Assessment of immunosuppressant therapy     | x                | x |              |   |   | x | x  | x                 | x  |

## The timeline and means of assessments

CHQLQ: Chronic headache quality of life questionnaire; MINI ICD 10: Mini-International Neuropsychiatric Review version 10; PSQI: Pittsburgh sleep quality index; SF 36: 36-item short form survey; SLE: systemic lupus erythematosus; SLEDAI: systemic lupus erythematosus disease activity index.
